# Supplementary material
Source: PubMed Central journal article supplement (PMC3178504)
Supplement: supp_jlb.0907656_Nilsen_video_legend.pdf [file supp_jlb.0907656_Nilsen_video_legend.pdf]

### **Supplementary video: Surface TLR2 is internalized into endosomes**

Video of internalization of anti-TLR2 mAb (red) in MDCK cells expressing Eea-1 GFP (green) and TLR2 at 4 s interval time-points. Cells were transiently transfected with TLR2 24 h prior to the experiment using Oligofectamine transfection reagent. Cells were kept on ice for 45 min and then incubated with Alexa 546 conjugated TLR2 mAb on ice for 45 minutes. Image acquiring was initiated 15 min post incubation. Imaging was performed on an Olympus Fluoview 1000 at 37 Olympus PlanApo 60X/1.42 Oil objective.
